# Supplementary material for: Neural crest and periderm-specific requirements of Irf6 during neural tube and craniofacial development
Source: PubMed Central journal article supplement — bioRxiv. 2024 Jun 11:2024.06.11.598425. Preprint. [Version 1] doi: 10.1101/2024.06.11.598425 (PMC11195129; doi:10.1101/2024.06.11.598425), 2024-06-11

408 **Fig. S1.** *Crect*-driven *Irf6* ablation recapitulates the global *Irf6* KO phenotype. **A.** Representative  
409 images of littermate control and *Crect*<sup>+</sup>-*Irf6*<sup>fl/fl</sup> cKO pups at approximately E17. *Crect*<sup>+</sup>-*Irf6*<sup>fl/fl</sup> pups  
410 exhibit “cocooning” taught skin, abnormal and shortened limbs, and an umbilical hernia that has  
411 been described for the *Irf6* global KO. **B.** Hematoxylin and eosin staining of coronal sections of  
412 approximately E17 *Crect*<sup>+</sup>-*Irf6*<sup>fl/fl</sup> pup and littermate control. *Crect*<sup>+</sup>-*Irf6*<sup>fl/fl</sup> cKO pups exhibit severe  
413 oral adhesions and cleft palate similar to the global *Irf6* KO mouse. Scale: 100 μM.  
414

# Figure S1

## A

control

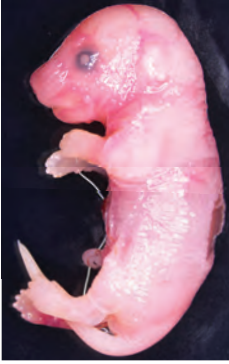

***Crect*<sup>+</sup>**  
***Irf6* cKO**

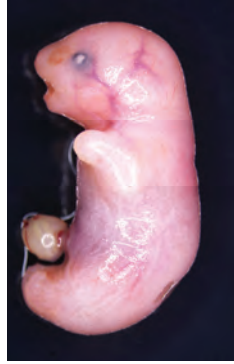

## B

control

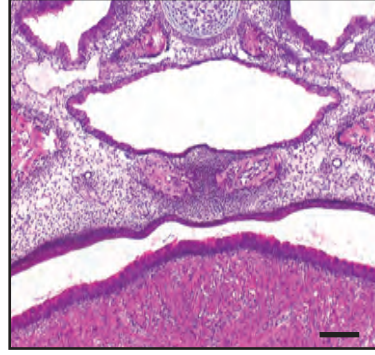

***Crect*<sup>+</sup>**  
***Irf6* cKO**

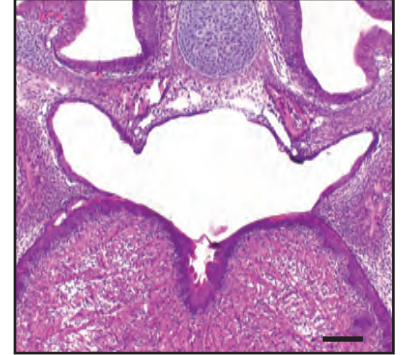

Supplement: NIHPP2024.06.11.598425v1-supplement-1.pdf [file NIHPP2024.06.11.598425v1-supplement-1.pdf]
